# Supplementary material for: Novel Immunity Proteins Associated with Colicin M-like Bacteriocins Exhibit Promiscuous Protection in Pseudomonas
Source: PubMed Central journal article supplement (PMC5277000; doi:10.3389/fmicb.2017.00093), 2017-01-30
Supplement: DataSheet1.pdf [file DataSheet1.pdf]

*Supplementary Material*

**Novel immunity proteins associated with colicin M-like bacteriocins  
exhibit promiscuous protection in *Pseudomonas***

**Maarten G. K. Ghequire<sup>1,2\*</sup>, Lieselore Kemland<sup>1</sup>, René De Mot<sup>1</sup>**

<sup>1</sup>Centre of Microbial and Plant Genetics, KU Leuven, 3001 Heverlee, Belgium

<sup>2</sup>National Institute of Diabetes and Digestive and Kidney Diseases, National Institutes of Health, Bethesda, MD, USA

\* **Correspondence:** Maarten Ghequire: [maarten.ghequire@biw.kuleuven.be](mailto:maarten.ghequire@biw.kuleuven.be)

**Supplementary Table S1. Strains and plasmids used in this study.**

| Plasmid/strain                 | Purpose of use                                                                                                               | Reference                            |
|--------------------------------|------------------------------------------------------------------------------------------------------------------------------|--------------------------------------|
| pET28a                         | pBR322 origin, His-tag/thrombin/T7 tag ; Km <sup>R</sup>                                                                     | Novagen                              |
| pJB3Tc20                       | Broad-host-range cloning vector; Ap <sup>R</sup> , Tc <sup>R</sup>                                                           | (Blatny <i>et al.</i> , 1997)        |
| pCMPG6248                      | pET28a with 827-bp PCR-amplified fragment containing <i>pseuM</i> from <i>P. syringae</i> DC3000, cloned in NcoI/XhoI        | This study                           |
| pCMPG6250                      | pET28a with 866-bp PCR-amplified fragment containing <i>pseuM</i> from <i>P. aeruginosa</i> NCTC10332, cloned in NcoI/XhoI   | This study                           |
| pCMPG6251                      | pJB3Tc20 with 445-bp PCR-amplified fragment containing <i>pmiA</i> from <i>P. syringae</i> DC3000, cloned in PstI/XbaI       | This study                           |
| pCMPG6252                      | pJB3Tc20 with 467-bp PCR-amplified fragment containing <i>pmiA</i> from <i>P. aeruginosa</i> NCTC10332, cloned in PstI/EcoRI | This study                           |
| pCMPG6266                      | Mutant construct of pCMPG6251; D36A variant of the encoded PmiA                                                              | This study                           |
| pCMPG6267                      | Mutant construct of pCMPG6252; D34A variant of the encoded PmiA                                                              | This study                           |
| pCMPG6269                      | pJB3Tc20 with 504-bp PCR-amplified fragment containing <i>pmiA</i> from <i>P. fluorescens</i> Q8r1-96, cloned in PstI/XbaI   | This study                           |
| pCMPG6270                      | Mutant construct of pCMPG6269; D39A variant of the encoded PmiA                                                              | This study                           |
| pCMPG6271                      | pET28a with 812-bp PCR-amplified fragment containing <i>pseuM</i> from <i>P. fluorescens</i> Q8r1-96, cloned in NcoI/XhoI    | This study                           |
| pCMPG6272                      | pJB3Tc20 with 478-bp PCR-amplified fragment containing <i>pmiA</i> from <i>Pseudomonas</i> sp. 5, cloned in PstI/XbaI        | This study                           |
| pCMPG6273                      | pJB3Tc20 with 465-bp PCR-amplified fragment containing <i>pmiA</i> from <i>Pseudomonas</i> sp. Pf153, cloned in PstI/XbaI    | This study                           |
| pCMPG6274                      | pJB3Tc20 with 459-bp PCR-amplified fragment containing <i>pmiA</i> from <i>P. fluorescens</i> Pf29Arp, cloned in PstI/XbaI   | This study                           |
| pCMPG6275                      | pJB3Tc20 with 497-bp PCR-amplified fragment containing <i>pmiA</i> from <i>P. brassicacearum</i> DF41, cloned in PstI/XbaI   | This study                           |
| pCMPG6276                      | pJB3Tc20 with 466-bp PCR-amplified fragment containing <i>pmiA</i> from <i>Pseudomonas</i> sp. GM21, cloned in PstI/XbaI     | This study                           |
| pCMPG6277                      | pJB3Tc20 with 456-bp PCR-amplified fragment containing <i>pmiA</i> from <i>P. fluorescens</i> AU2390, cloned in PstI/XbaI    | This study                           |
| <i>E. coli</i> BL21(DE3)       | Expression host                                                                                                              | VWR                                  |
| <i>E. coli</i> DH5 $\alpha$    | Propagation of pET28a- and pJB3Tc20-derived plasmids                                                                         | Thermo Fischer                       |
| <i>P. aeruginosa</i> CPHL12447 | Indicator strain for PaeM (PseuM <sub>NCTC10332</sub> )                                                                      | J. P. Pirnay                         |
| <i>P. aeruginosa</i> NCTC10332 | Strain encoding PaeM (PseuM <sub>NCTC10332</sub> )                                                                           | BCCM                                 |
| <i>P. fluorescens</i> F113     | Indicator strain for PflM (PseuM <sub>Q8r1-96</sub> )                                                                        | (Redondo-Nieto <i>et al.</i> , 2013) |
| <i>P. fluorescens</i> Q8r1-96  | Strain encoding PflM (PseuM <sub>Q8r1-96</sub> )                                                                             | (Loper <i>et al.</i> , 2012)         |
| <i>P. syringae</i> LMG 5456    | Indicator strain for PsyM (PseuM <sub>DC3000</sub> )                                                                         | BCCM                                 |
| <i>P. syringae</i> DC3000      | Strain encoding PsyM (PseuM <sub>DC3000</sub> )                                                                              | (Buell <i>et al.</i> , 2003)         |

**Supplementary Table S2. Primers used in this study.**

| Number      | Sequence <sup>a</sup> (5' to 3')         | Purpose of use                                                           |
|-------------|------------------------------------------|--------------------------------------------------------------------------|
| PGPRB-8461  | GCTCACTCATTAGGCACCC                      | Sequencing of inserts in pJB3Tc20                                        |
| PGPRB-9001  | TGGCTACCATGGGTCCTATTGAGCTTCTCCGACATACAT  | Cloning of PseuM <sub>DC3000</sub> in pET28a (pCMPG6248)                 |
| PGPRB-9002  | TGGCTACTCGAGGTTGCCACTAACCGTAACCGG        | Cloning of PseuM <sub>DC3000</sub> in pET28a (pCMPG6248)                 |
| PGPRB-9003  | TGGCTACCATGGGTGCAATGGATCTTGGTACCACAACAAT | Cloning of PseuM <sub>NCTC10332</sub> in pET28a (pCMPG6250)              |
| PGPRB-9004  | TGGCTACTCGAGACCAGAAATATTAACAGGGATAGTACCC | Cloning of PseuM <sub>NCTC10332</sub> in pET28a (pCMPG6250)              |
| PGPRB-9005  | TGGCTACCATGGGTGAATTCGAGCTTCCAGCTACTT     | Cloning of PseuM <sub>Q8r1-96</sub> in pET28a (pCMPG6271)                |
| PGPRB-9006  | TGGCTACTCGAGTCGGGCGTAGCTAATAGGG          | Cloning of PseuM <sub>Q8r1-96</sub> in pET28a (pCMPG6271)                |
| PGPRB-9007  | TGGCTACTGCAGCTTTCATAAGGATTGACAATGGCTGC   | Cloning of PmiA <sub>DC3000</sub> in pJB3Tc20 (pCMPG6251)                |
| PGPRB-9008  | TGGCTATCTAGAAGCGCCTGAAATCAGACGCTA        | Cloning of PmiA <sub>DC3000</sub> in pJB3Tc20 (pCMPG6251)                |
| PGPRB-9009  | TGGCTACTGCAGACCATAAGAGGATGGTTTCATGAGA    | Cloning of PmiA <sub>NCTC10332</sub> in pJB3Tc20 (pCMPG6252)             |
| PGPRB-9010  | TGGCTAGAATTCTTGTATCGCAGCTTTACGTCTACT     | Cloning of PmiA <sub>NCTC10332</sub> in pJB3Tc20 (pCMPG6252)             |
| PGPRB-9011  | TGGCTACTGCAGAGGTTTTTGCAATAATATCGCTAGGAT  | Cloning of PmiA <sub>Q8r1-96</sub> in pJB3Tc20 (pCMPG6269)               |
| PGPRB-9012  | TGGCTATCTAGACATCATCCTGCGCAGTCATG         | Cloning of PmiA <sub>Q8r1-96</sub> in pJB3Tc20 (pCMPG6269)               |
| PGPRB-9013  | CTACAGCCTTCTGCTACCTATGGGCTG              | Construction of a D36A mutation in PmiA <sub>DC3000</sub> (pCMPG6266)    |
| PGPRB-9014  | CAGCCCATAGGTAGCAGAAGGCTGTAG              | Construction of a D36A mutation in PmiA <sub>DC3000</sub> (pCMPG6266)    |
| PGPRB-9015  | GTC AACCCCGATGCCACCACGGGTGTT             | Construction of a D34A mutation in PmiA <sub>NCTC10332</sub> (pCMPG6267) |
| PGPRB-9016  | AACACCCGTGGTGGCATCGGGGTTGAC              | Construction of a D34A mutation in PmiA <sub>NCTC10332</sub> (pCMPG6267) |
| PGPRB-9017  | AACCCAAGTGCTACATCTGGC                    | Construction of a D39A mutation in PmiA <sub>Q8r1-96</sub> (pCMPG6270)   |
| PGPRB-9018  | GCCAGATGTAGCACTTGGGTT                    | Construction of a D39A mutation in PmiA <sub>Q8r1-96</sub> (pCMPG6270)   |
| PGPRB-10029 | TGGCAGCAGCCAACTCAGCTT                    | Sequencing of inserts in pET28a                                          |
| PGPRB-10030 | TATAGGC GCCAGCAACCGCA                    | Sequencing of inserts in pET28a                                          |
| PGPRB-10318 | TGGCTACTGCAGCGATAGGCATAGAGAAGACATGAA     | Cloning of PmiA <sub>5</sub> in pJB3Tc20 (pCMPG6272)                     |
| PGPRB-10319 | TGGCTATCTAGAGCGGATGGATTGGTTGATT          | Cloning of PmiA <sub>5</sub> in pJB3Tc20 (pCMPG6272)                     |
| PGPRB-10320 | TGGCTACTGCAGTTTCTCTAGGTGAACAGCAATGGTAG   | Cloning of PmiA <sub>Pf153</sub> in pJB3Tc20 (pCMPG6273)                 |
| PGPRB-10321 | TGGCTATCTAGACCGCTCGTCCTGCAAAAAGGC        | Cloning of PmiA <sub>Pf153</sub> in pJB3Tc20 (pCMPG6273)                 |
| PGPRB-10322 | TGGCTACTGCAGTTTTTCAAGGTAACCCACTATGATT    | Cloning of PmiA <sub>Pf29Atp</sub> in pJB3Tc20 (pCMPG6274)               |
| PGPRB-10323 | TGGCTATCTAGATGCCCTGGGAAGGACAAG           | Cloning of PmiA <sub>Pf29Atp</sub> in pJB3Tc20 (pCMPG6274)               |
| PGPRB-10324 | TGGCTACTGCAGTTTCTCTAGGTAAGTAGCCATGG      | Cloning of PmiA <sub>DF41</sub> in pJB3Tc20 (pCMPG6275)                  |

|             |                                         |                                                           |
|-------------|-----------------------------------------|-----------------------------------------------------------|
| PGPRB-10325 | TGGCTATCTAGAAAGAGTAATCTTCACCGCGCA       | Cloning of PmiA <sub>DF41</sub> in pJB3Tc20 (pCMPG6275)   |
| PGPRB-10326 | TGGCTACTGCAGATAACAGGAGCAAACTCCATG       | Cloning of PmiA <sub>GM21</sub> in pJB3Tc20 (pCMPG6276)   |
| PGPRB-10327 | TGGCTATCTAGAGCCTAAAGATGTTCAAGGGAGT      | Cloning of PmiA <sub>GM21</sub> in pJB3Tc20 (pCMPG6276)   |
| PGPRB-10328 | TGGCTACTGCAGAAGAGCGTGGAATATTTAAATGAATCT | Cloning of PmiA <sub>AU2390</sub> in pJB3Tc20 (pCMPG6277) |
| PGPRB-10329 | TGGCTATCTAGAAAACATCATGATCGAGCGTACT      | Cloning of PmiA <sub>AU2390</sub> in pJB3Tc20 (pCMPG6277) |

<sup>a</sup> Restriction sites incorporated in the primers are underlined: GAATTC, EcoRI; CCATGG, NcoI; CTGCAG, PstI; TCTAGA, XbaI;CTCGAG, XhoI.

**Figure S1.** (A) Multiple sequence alignment of ColM domains derived from unique PseuM proteins from *Pseudomonas* spp. Abbreviations for species names are as in Figure 1. Other abbreviations: Pced, *Pseudomonas cedrina*; Pcor ory, *Pseudomonas coronafaciens* pv. *oryzae*; Pden, *Pseudomonas denitrificans*; Pkor, *Pseudomonas koreensis*; Ppro, *Pseudomonas protegens*; Psyr ace-cori-mors-syrthe, *Pseudomonas syringae aceris-coriandricola-morsprunorum-syringae-theae*; Pthi, *Pseudomonas thivervalensis*; Pver, *Pseudomonas veronii*. Grey shading reflects the degree of conservation. (B) Unrooted maximum likelihood phylogenetic tree of ColM domains of pseudomonads (black) from panel (A) and previously characterized ColM domain-carrying bacteriocins from other  $\beta$ - and  $\gamma$ -proteobacteria: colicin M (ColM, red) from *E. coli*, pectocin M1 and M2 from *Pectobacterium* spp. (PecM1/PecM2, pink), burkhocin M1 and M2 from *Burkholderia* spp. (BurM1/BurM2, grey). *Pseudomonas* abbreviations as in (A). The clade of *Pseudomonas* ColM domains from bacteriocins linked with a *pmiA*-type immunity gene and *pmiB*-type immunity gene are in a red arc and a blue ellipse, respectively. Other abbreviations: Bamb, *Burkholderia ambifaria*; Ecoli, *Escherichia coli*; Pcar, *Pectobacterium carotovorum*. The scale represents 0.6 substitutions per site. Bootstrap values (percentages of 1000 replicates) are not shown for visibility.



B

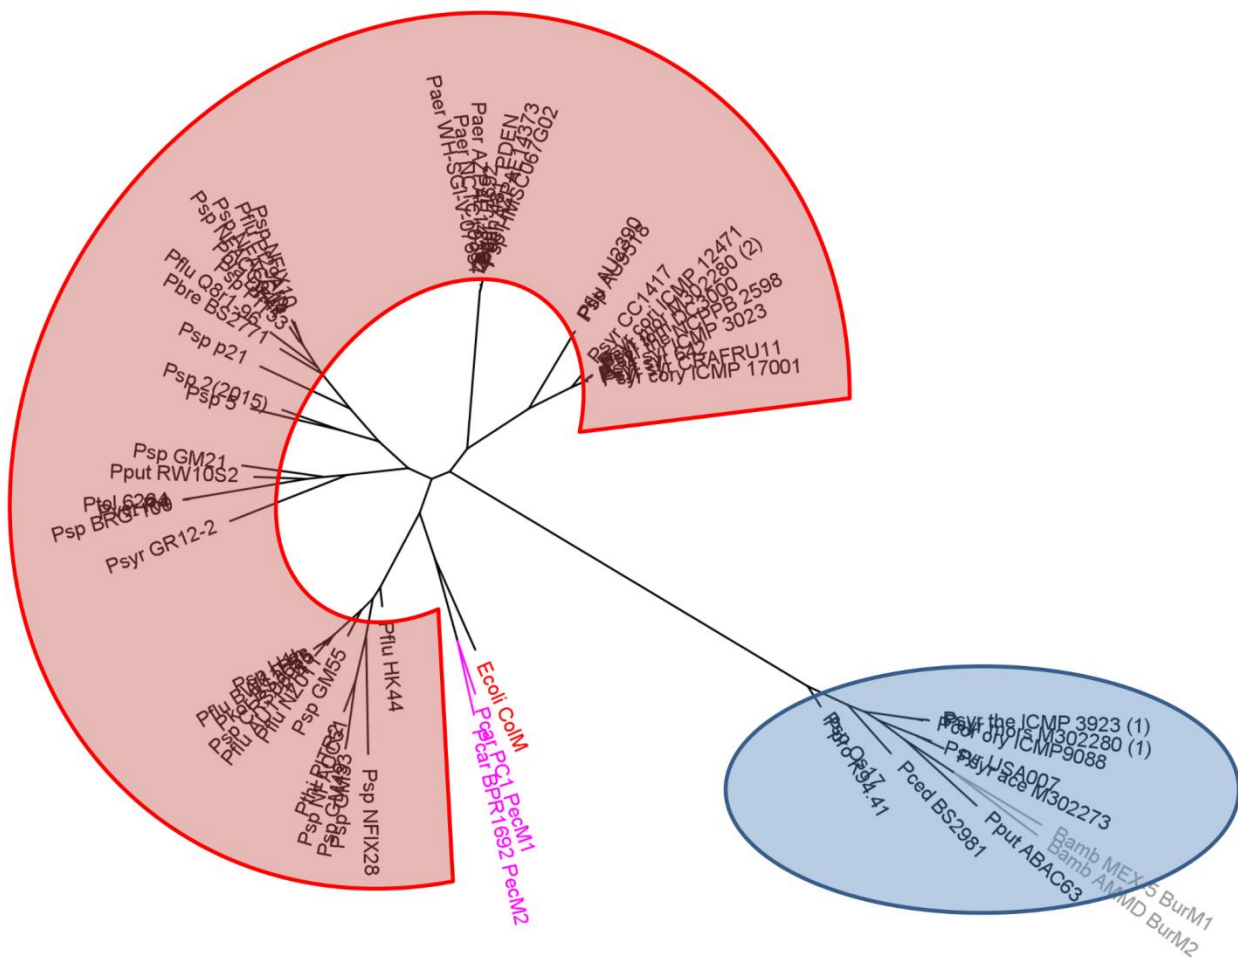

0.6

**Figure S2.** Multiple sequence alignment of BmiB (*Burkholderia* spp.) and unique PmiB (*Pseudomonas* spp.) proteins. Grey shading indicates the degree of conservation. Abbreviations for *Burkholderia* species names: Bubo, *Burkholderia ubonensis*; Bcon, *Burkholderia contaminans*; Bamb, *Burkholderia ambifaria*; Bokl, *Burkholderia oklahomensis*; Bcep, *Burkholderia cepacia*; Bcen, *Burkholderia cenocepacia*; Bpyr, *Burkholderia pyrrocinia*; Burk, *Burkholderia* sp. *Pseudomonas* abbreviations are as in Figure 1 and Figure S1. Predicted transmembrane helices are boxed in blue, Sec- or Tat-dependent signal sequences in red and lipoprotein signal sequences in yellow. Two conserved cysteine residues are highlighted in green.

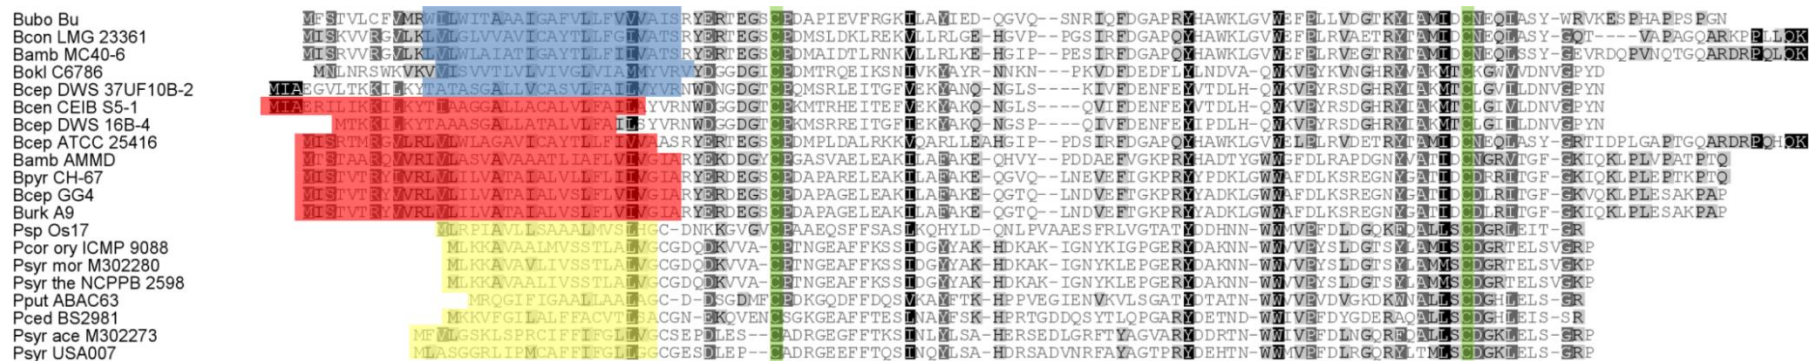

**Figure S3.** Multiple sequence alignment of unique PmiA proteins. Predicted transmembrane helices are boxed in blue, Sec- or Tat-dependent signal sequences in red. Grey shading indicates the degree of conservation. *Pseudomonas* species abbreviations are as in Figure S1. This multiple sequence alignment was used for construction of phylogenetic tree in Figure 1B.

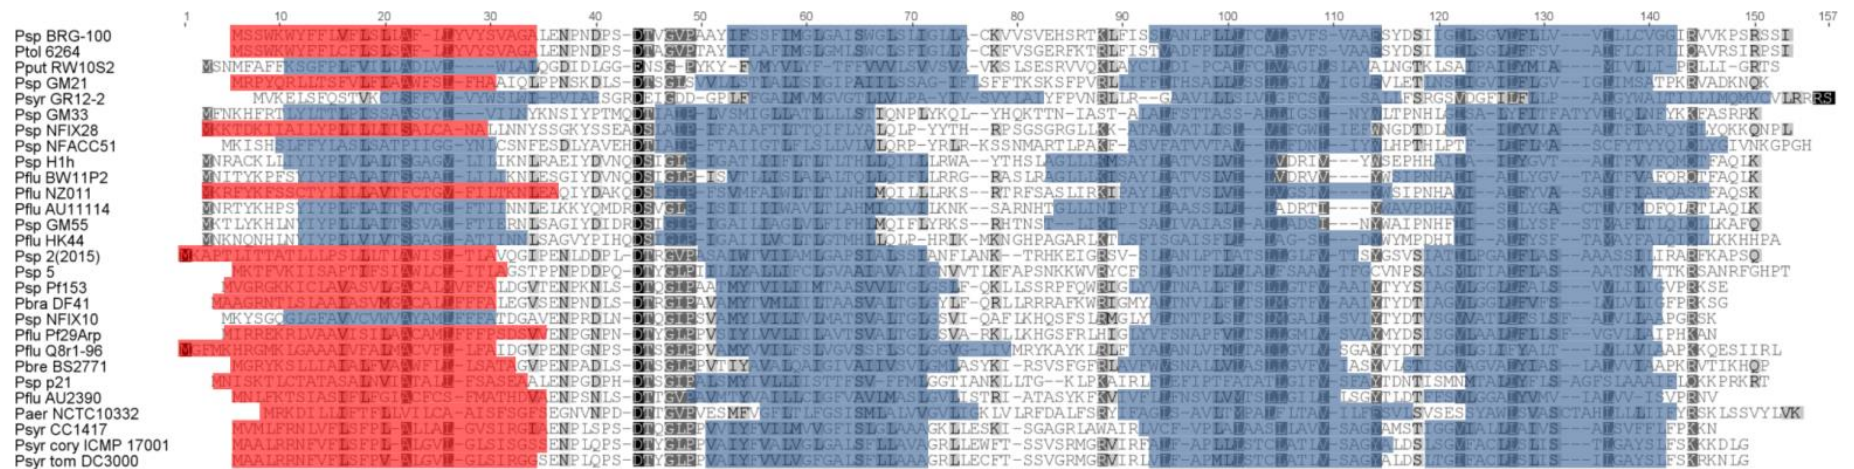

## References

- Blatny, J. M., Brautaset, T., Winther-Larsen, H. C., Haugan, K. and Valla, S. (1997). Construction and use of a versatile set of broad-host-range cloning and expression vectors based on the RK2 replicon. *Appl. Environ. Microbiol.* 63, 370-379.
- Buell, C. R., Joardar, V., Lindeberg, M., Selengut, J., Paulsen, I. T., Gwinn, M. L., et al. (2003). The complete genome sequence of the *Arabidopsis* and tomato pathogen *Pseudomonas syringae* pv. *tomato* DC3000. *Proc. Natl. Acad. Sci. U. S. A.* 100, 10181-10186.
- Loper, J. E., Hassan, K. A., Mavrodi, D. V., Davis, E. W., 2<sup>nd</sup>, Lim, C. K., Shaffer, B. T., et al. (2012). Comparative genomics of plant-associated *Pseudomonas* spp.: insights into diversity and inheritance of traits involved in multitrophic interactions. *PLoS Genet.* 8, e1002784. doi: 10.1371/journal.pgen.1002784
- Redondo-Nieto, M., Barret, M., Morrissey, J., Germaine, K., Martinez-Granero, F., Barahona, E., et al. (2013). Genome sequence reveals that *Pseudomonas fluorescens* F113 possesses a large and diverse array of systems for rhizosphere function and host interaction. *BMC Genomics* 14, 54. doi: 10.1186/1471-2164-14-54
